## AT A GLANCE

# Hypothalamic circuits regulating appetite and energy homeostasis: pathways to obesity

Katharina Timper<sup>1,2,3</sup> and Jens C. Brüning<sup>1,2,3,4,\*</sup>

## ABSTRACT

The ‘obesity epidemic’ represents a major global socioeconomic burden that urgently calls for a better understanding of the underlying causes of increased weight gain and its associated metabolic comorbidities, such as type 2 diabetes mellitus and cardiovascular diseases. Improving our understanding of the cellular basis of obesity could set the stage for the development of new therapeutic strategies. The CNS plays a pivotal role in the regulation of energy and glucose homeostasis. Distinct neuronal cell populations, particularly within the arcuate nucleus of the hypothalamus, sense the nutrient status of the organism and integrate signals from peripheral hormones including pancreas-derived insulin and adipocyte-derived leptin to regulate calorie intake, glucose metabolism and energy expenditure. The arcuate neurons are tightly connected to other specialized neuronal subpopulations within the hypothalamus, but also to various extrahypothalamic brain regions, allowing a coordinated behavioral response. This At a Glance article gives an overview of the recent knowledge, mainly derived from rodent models, regarding the CNS-dependent regulation of energy and glucose homeostasis, and illustrates how dysregulation of the neuronal networks involved can lead to overnutrition and obesity. The potential impact of recent research findings in the field on therapeutic treatment strategies for human obesity is also discussed.

**KEY WORDS:** Obesity, Type 2 diabetes mellitus, Glucose homeostasis, Hypothalamus, CNS

## Introduction

The number of overweight and obese people worldwide has increased over recent years, giving rise to a global obesity epidemic. According to the World Health Organization (WHO), in 2014, more than 1.9 billion adults were overweight, of which over 600 million were classified as clinically obese (WHO, 2015). Perhaps even more alarmingly, 42 million children under the age of 5 were overweight or obese in 2013 (WHO, 2015). Obesity is a major risk factor for associated comorbidities such as cardiovascular diseases (Kim et al., 2015), type 2 diabetes mellitus, cancer (Calle et al., 2003) and musculoskeletal disorders, and is associated with an increased overall mortality relative to non-obese individuals (Adams et al., 2006).

Obesity results from the dysregulation of energy metabolism (Crowley et al., 2002). The central nervous system (CNS) plays a

key role in sensing and controlling the energy status of the organism (Myers and Olson, 2012), and the hypothalamus in particular has emerged as an integrating, superordinate master regulator of whole-body energy homeostasis. Obesity has long been considered to be the result of a lack of discipline and effort to reduce calorie intake and to increase physical activity, which has led to a fundamental and still present social weight-related stigmatization of affected individuals (Friedman, 2004). However, extensive research in both humans and various murine model systems over recent decades has revealed that a complex interplay of genes and environmental factors that impact CNS control of food intake and energy homeostasis pave the way for the development of obesity. In this review and its accompanying poster, we provide a snapshot of the hypothalamic neurocircuits that regulate the homeostatic control of energy metabolism and feeding. We also give an overview of the pleiotropic factors involved in the regulation and dysregulation of the homeostatic hypothalamic system in the context of obesity, including hypothalamic inflammation as well as insulin and leptin resistance. Later, we discuss the impact of a maternal high-fat diet and obesity on offspring and highlight the importance of mitochondrial dynamics and genetic factors involved in the development of obesity at the level of the hypothalamic neurocircuits. Thereby, most of the molecular insights summarized in this article are derived from studies in rodent model organisms. Finally, we provide our outlook on recent perspectives on CNS-dependent control of feeding behavior and metabolism, and future therapeutic approaches to tackle dysfunctional regulation of central energy homeostasis.

## Hypothalamic neuronal circuits controlling feeding behavior and energy homeostasis

### Key hypothalamic nuclei

The hypothalamus is one of the best-studied and most important brain regions involved in the central control of feeding and energy expenditure. In particular, the arcuate nucleus (ARC) within the hypothalamus is critical for the regulation of feeding and metabolism (Myers and Olson, 2012). The ARC is located near to the median eminence (ME; see poster), a circumventricular organ that is rich in fenestrated capillaries that lead to a ‘leaky’ blood-brain barrier (BBB). The ME facilitates transport of peripheral hormonal and nutrient signals and their sensing by the ARC neurons (Rodríguez et al., 2010). Thereby, the ARC integrates hormonal and nutritional metabolic signals from the peripheral circulation as well as peripheral and central neuronal inputs to generate a coordinated feedback response.

There are two distinct, functionally antagonistic types of neurons in the ARC: the orexigenic (appetite-stimulating) neuropeptide Y (NPY) and agouti-related peptide (AgRP)-expressing AgRP/NPY neurons and the anorexigenic (appetite-suppressing) pro-opiomelanocortin (POMC)-expressing POMC neurons (see poster) (Gropp et al., 2005; Balthasar et al., 2005). POMC neurons project mainly to second-order neurons in the

<sup>1</sup>Max Planck Institute for Metabolism Research, Department of Neuronal Control of Metabolism, Gleueler Str. 50, Cologne 50931, Germany. <sup>2</sup>Center for Endocrinology, Diabetes and Preventive Medicine (CEDP), University Hospital Cologne, Kerpener Str. 26, Cologne 50924, Germany. <sup>3</sup>Excellence Cluster on Cellular Stress Responses in Aging Associated Diseases (CECAD) and Center of Molecular Medicine Cologne (CMCC), University of Cologne, Joseph-Stelzmann-Str. 26, Cologne 50931, Germany. <sup>4</sup>National Center for Diabetes Research (DZD), Ingolstädter Land Str. 1, Neuherberg 85764, Germany.

\*Author for correspondence (bruening@sf.mpg.de)

This is an Open Access article distributed under the terms of the Creative Commons Attribution License (<http://creativecommons.org/licenses/by/3.0/>), which permits unrestricted use, distribution and reproduction in any medium provided that the original work is properly attributed.

Healthy state

Fasting state

Within the ARC, two distinct, functionally antagonistic, neuronal cell types have been defined: the orexigenic (appetite-stimulating) AgRP and NPY-expressing neurons and the anorexigenic (appetite-suppressing) POMC-expressing neurons. In the fasting state, ghrelin robustly stimulates feeding by activating AgRP/NPY neurons, which also project to second-order neurons located in the PVN and in the LH. Ghrelin also promotes whole body energy storage via direct effects on PVN neurons. Activation of AgRP/NPY neurons results in a release of NPY, leading to increased food intake, a reduction in EE and increased HGP and the release of AgRP, which acts as an inverse agonist at the MC3/4R, preventing the anorexigenic

effect of POMC neurons. AgRP/NPY neurons also directly inhibit POMC neurons via inhibitory GABA action at the level of the ARC. On the cellular level, increased activity of AgRP/NPY neurons is associated with decreased ROS levels, enabling sustained AgRP/NPY firing.

It has also been shown that GABA release from AgRP/NPY projections to extrahypothalamic neurons, specifically in the PBN, plays a role in the stimulation of food intake. Furthermore, hypothalamic neurocircuits are directly connected with the mesolimbic reward system, comprising the VTA and the NAc, which control the 'hedonic' aspects of food intake.

Postprandial or feeding state

The ME allows facilitated transport of peripheral hormones and nutrients to the neurons in the ARC, enabling the latter to integrate metabolic signals from the periphery as well as peripheral and central neuronal inputs to generate a coordinated feedback response on energy and glucose homeostasis. In the postprandial state, AgRP/NPY neurons are inhibited while POMC neurons are activated by hormones from adipose tissue, pancreas and GI tract. POMC neuron firing is also increased upon direct sensing of glucose and fatty acids. Upon activation, POMC neurons release  $\alpha$ -MSH, which activates MC3/4R, resulting in a decrease in food

intake and HGP as well as an increase in EE. POMC neurons project mainly to second-order neurons in the PVN, but also in the DMH, LH and VMH. Strikingly, the visual and olfactory sensing of food without its ingestion is sufficient to activate POMC and to inhibit AgRP/NPY neurons. Finally, astrocytes directly inhibit AgRP/NPY neurons and are involved in leptin- and insulin-dependent control of feeding and glucose homeostasis. Hormones and nutrients from the periphery also directly act on other neuronal cell populations within and outside the hypothalamus.

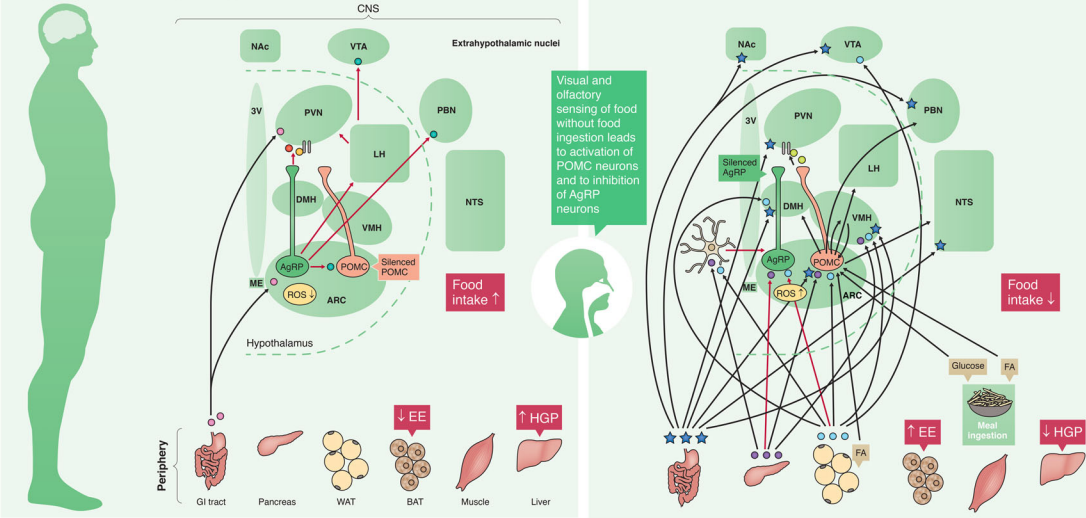

Obese state

Fasting state

In high-fat-diet-induced obesity, the ability of ghrelin to induce food intake at the level of the ARC/AgRP/NPY neurons is impaired, probably as an adaptive mechanism to prevent further food intake in obese individuals. However, ghrelin action on PVN neurons is preserved, leading to an increase in energy storage and adiposity independent of food intake. Furthermore, UDP, which is synthesized

from circulating uridine, directly activates AgRP/NPY neurons and thereby robustly promotes feeding. Because plasma levels of uridine are elevated in obesity, increased hypothalamic UDP levels could further promote food intake in the obese state. Key changes relative to the normal fasting state are indicated in the figure.

Postprandial or feeding state

As an early event in obesity development, increased levels of saturated FAs from the periphery cross the BBB and induce an inflammatory response in hypothalamic neurons. This local inflammation induces a central resistance to insulin and leptin action, contributing to hyperphagia and dysregulation of glucose homeostasis. While POMC and AgRP neurons in the ARC develop insulin resistance in response to a high-fat diet, SF-1-expressing neurons in the VMH increase their insulin sensitivity, leading to impaired POMC function. Similarly, leptin sensitivity is retained in the DMH, whereas the VTA and POMC neurons display leptin resistance, leading to hyperphagia, obesity and obesity-related hypertension. Leptin and insulin resistance in the CNS can also result from overactivation of the

STAT3/SOCS pathway (not shown). In addition, high-fat feeding leads to pleiotropic ROS levels and consequently impaired satiety signaling in POMC neurons. Overall, obesity is associated with a selective insulin and leptin resistance at the level of the CNS, promoting hyperphagia, weight gain and a dysregulation in glucose homeostasis. Unsurprisingly, mutations in MC4R and POMC genes, as well as in the genes encoding leptin (LEP), the leptin receptor (LEPR) or in the FTO gene, are linked to severe hyperphagia and obesity.

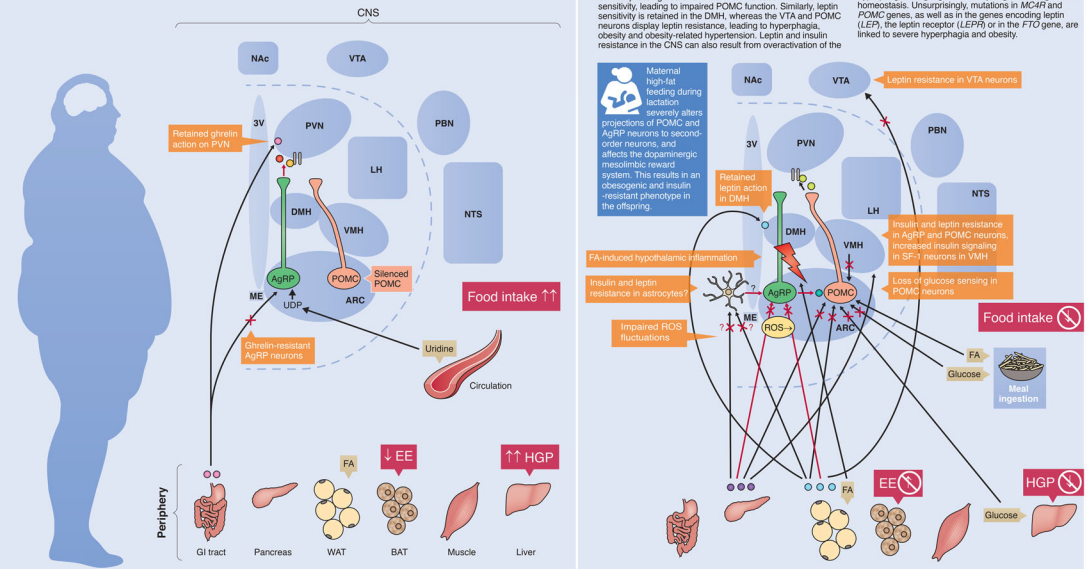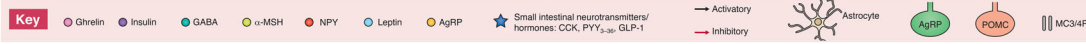

Abbreviations: 3V, third ventricle; AgRP, agouti-related protein; ARC, arcuate nucleus; BAT, brown adipose tissue; CCK, cholecystokinin; DMH, dorsomedial hypothalamus; EE, energy expenditure; FA, fatty acids; GABA, gamma-aminobutyric acid; GI, gastrointestinal; CNS, central nervous system; HGP, hepatic glucose production; LEPR, leptin receptor gene; LH, lateral hypothalamic area; MC4R, melanocortin 4 receptor; ME, median eminence; Nac, nucleus accumbens; NPY, neuropeptide Y; NTS, nucleus tractus solitarius; LEP, leptin gene; PBN, parabrachial nucleus; POMC, proopiomelanocortin; PP, pancreatic polypeptide; PVN, paraventricular nucleus; PYY3-36, pancreatic peptide YY3-36; ROS, reactive oxygen species; SF-1, steroidogenic factor 1; STAT3/SOCS3, signal transducer and activator of transcription 3/steroid-inducible co-suppressor 3; UDP, uridine diphosphate; VMH, ventromedial hypothalamus; VTA, ventral tegmental area; WAT, white adipose tissue.

The neuronal pathways illustrated in this poster are based on evidence mainly from rodent studies. For further details and associated references, see main text at doi: 10.1242/dmm.026609.

© 2017, Published by The Company of Biologists Ltd

paraventricular hypothalamic nucleus (PVN), but also to the dorsomedial hypothalamus (DMH), the lateral hypothalamus (LH) and the ventromedial hypothalamus (VMH) (see poster) (Kleinridders et al., 2009; Waterson and Horvath, 2015). These second-order neurons further process the received information and project to multiple neurocircuits outside of the hypothalamus (extrahypothalamic), leading to an integrated response on energy intake and expenditure, respectively (Roh et al., 2016). Neurons within the PVN control sympathetic outflow to peripheral organs (Kannan et al., 1989) and secrete a variety of regulatory neuropeptides (Roh et al., 2016). Destruction of the PVN leads to overeating and obesity (Leibowitz et al., 1981), pointing to the important role of PVN neurons for the inhibitory control of food intake. Moreover, destruction of the VMH results in hyperphagia and obesity (Shimizu et al., 1987), whereas deletion of the DMH (Bellinger and Bernardis, 2002) and the LH (Milam et al., 1980) produces a hypophagic, lean phenotype.

Upon nutrient ingestion, POMC is cleaved to  $\alpha$ -melanocyte-stimulating hormone ( $\alpha$ -MSH) which is released from POMC-axons to activate melanocortin 3 and 4 receptors (MC3/4R) on downstream neurons, including neurons in the PVN (see poster; Healthy postprandial or feeding state), resulting in a decrease in food intake and an increase in energy expenditure (Könner et al., 2009). Although MC4R expression is widely distributed among different brain regions (Gantz et al., 1993a,b; Liu et al., 2003), within the hypothalamus, the PVN displays the highest MC4R expression and is considered to host the predominant energy-intake-regulating MC4R population within the CNS (see Tao, 2010; Krashes et al., 2016 for reviews). Consistent with this, studies in mice have shown that disruption of the MC4R, and specifically in the PVN, results in obesity as a result of hyperphagia and reduced energy expenditure, along with deteriorations in glucose homeostasis (Huszar et al., 1997; Balthasar et al., 2005). Downstream mediators likely to be involved in transducing the effects of MC4R activation on food intake regulation are brain-derived neurotrophic factor (BDNF) (Xu et al., 2003; Nicholson et al., 2007), corticotropin-releasing hormone (CRH) (Lu et al., 2003) and thyrotropin-releasing hormone (TRH) (Fekete et al., 2000; Kim et al., 2000). While food intake is believed to be inhibited via hypothalamic melanocortineric neurons in a constant manner (Fan et al., 1997), energy expenditure is increased upon MC4R activation due to an increased activity of the sympathetic nervous system leading to brown adipose tissue (BAT) activation (Ste Marie et al., 2000; Voss-Andreae et al., 2007).

Fasting, on the other hand, induces the activation of AgRP/NPY neurons that project also to the PVN and the LH (see poster; Healthy fasting state) (Betley et al., 2013). AgRP/NPY neurons co-release NPY and AgRP. NPY directly stimulates food intake (Stanley and Leibowitz, 1984; Clark et al., 1984) via activation of NPY Y1 (Yokosuka et al., 1999) and Y5 (Parker et al., 2000; Cabrele et al., 2000; McCrea et al., 2000) receptors. Furthermore, NPY reduces energy expenditure via a Y1-receptor-mediated reduction in tyrosine hydroxylase expression in the PVN and the brainstem, which leads to a decreased sympathetic output to the BAT and concomitantly reduced BAT activity (Shi et al., 2013). AgRP acts as an inverse agonist of MC3/4R, thereby preventing the anorexigenic effect of  $\alpha$ -MSH on second-order neurons (Ollmann et al., 1997). Furthermore, AgRP/NPY neurons directly inhibit POMC neurons via inhibitory  $\gamma$ -aminobutyric acid (GABA) action at the level of the ARC (Cowley et al., 2001). Interestingly, while optogenetic activation of AgRP→POMC synaptic connections strongly inhibited POMC neuron activity, suppression of POMC neuron

activity by AgRP neurons was shown not to be required for acute feeding induction (Atasoy et al., 2012). However, exclusive activation of the ARC→PVN connection strongly induces feeding (Atasoy et al., 2012). GABA release from AgRP/NPY projections to extrahypothalamic neurons, specifically in the parabrachial nucleus (PBN), also plays a role in the stimulation of food intake (Wu et al., 2009, 2012), although the exclusive activation of the AgRP/NPY→PBN interconnection is not sufficient to induce feeding (Atasoy et al., 2012). Recently, a study involving optogenetic activation of AgRP neurons demonstrated that distinct AgRP neuron subpopulations project to different brain regions and that activation of some projections – including those to the PVN and LH, but not to the PBN – are able to independently induce feeding similar to somatic activation of AgRP neurons (Betley et al., 2013).

Of note, POMC and AgRP/NPY neurons also receive activating glutamatergic feedback input from other hypothalamic nuclei such as the VMH and the PVN, whereas PVN neurons receive inhibitory innervation from LH neurons that promote feeding, resulting in a finely tuned response regulating food intake (Waterson and Horvath, 2015). Strikingly, it has very recently been demonstrated that the visual and olfactory sensing of food without ingestion of any nutrients is sufficient to reverse the effects of fasting on POMC and AgRP/NPY neurons (Chen et al., 2015b).

As mentioned above, intrahypothalamic projections from ARC neurons to the PVN not only play a role in the regulation of food intake, but also in energy expenditure: POMC neurons increase (Enriori et al., 2011) while AgRP/NPY neurons decrease (Shi et al., 2013) metabolic activity in BAT (for reviews, see Waterson and Horvath, 2015; Morrison et al., 2014). Thus, in the fasting state, energy expenditure is decreased, and following food intake, energy expenditure is increased. Of note, we recently demonstrated that AgRP/NPY neuron activation regulates BAT glucose uptake through specific projections to the bed nucleus of the stria terminalis (BNST) (Steculorum et al., 2016), a forebrain structure involved in the control of neuroendocrine and autonomic responses, as well as feeding and reward behavior (Dong and Swanson, 2006). Thereby, this structure interconnects key nuclei of the limbic system with hypothalamic and brainstem structures in both rodents and humans (for reviews, see Crestani et al., 2013; Avery et al., 2016).

#### Extrahypothalamic neuronal circuits

Hypothalamic nuclei also project to and receive input from other extrahypothalamic brain regions such as the nucleus of the solitary tract (NTS) to regulate food intake and energy expenditure (for reviews, see Sohn et al., 2013a; Schneeberger et al., 2014; Morton et al., 2014; Waterson and Horvath, 2015; Roh et al., 2016; Roh and Kim, 2016). Furthermore, hypothalamic neurocircuits are directly connected to the mesolimbic reward system, comprising the ventral tegmental area (VTA) and the nucleus accumbens (NAc), which control the ‘hedonic’ aspects of food intake. Decreased glucose levels, such as those that occur in the fasting state, activate glutamate and orexin co-expressing neurons in the LH, which project to and excite dopaminergic neurons in the VTA (Sheng et al., 2014). In addition, activation of inhibitory GABAergic LH neurons that project to the VTA (see poster, Fasting state) leads to increased food intake and specifically consummatory behavior, which refers to the drive to receive a caloric reward (Jennings et al., 2015). In line with this, two recent studies showed that activation of GABAergic projection from the LH to the VTA enhances compulsive ‘sucrose seeking’ and therefore feeding-related behavior (Nieh et al., 2015; Barbano et al., 2016). Thus, homeostatic inputs from the hypothalamus are integrated with hedonic feeding signals from

mesolimbic pathways and signals from superordinate decision-making centers such as the amygdala, the hippocampus and the prefrontal cortex to generate an orchestrated response on feeding, glucose metabolism and energy homeostasis regulation. Although extensive research in rodent models in recent years has made a vast contribution to deciphering the underlying mechanisms of food-related reward stimuli and decision making (Stuber and Wise, 2016; de Macedo et al., 2016), the interplay of the different components of the reward system contributing to food-related reward in humans are far more complex. Indeed, a number of mostly fMRI-based studies have shed light on the complexity of feeding-related reward mechanisms and brain structures involved in humans (Kringelbach, 2005; Farr et al., 2016; Alonso-Alonso et al., 2015).

In summary, the hypothalamus plays a key role in the regulation of appetite and food intake both in humans and rodents (Yeo and Heisler, 2012). Furthermore, brain regions such as the amygdala and the striatum as well as the VTA, with its dopaminergic projections, are involved in both human and rodent food-related reward (Berridge and Kringelbach, 2008). However, distinct from rodents, in humans, reward and behavioral drives are strongly impacted and directed by cognition (Alonso-Alonso et al., 2015).

#### **Leptin and insulin as modulators of central control of feeding, glucose and energy homeostasis**

Both POMC and AgRP/NPY neurons express receptors for peripheral metabolic hormones such as insulin and leptin. Insulin is secreted from pancreatic  $\beta$ -cells upon nutrient ingestion (Prentki et al., 2013) and plays an important role in the peripheral regulation of energy and glucose homeostasis. It specifically controls peripheral glucose metabolism by suppressing hepatic glucose production (HGP) via direct action on hepatic insulin receptors. However, insulin is also a major factor in the regulation of glucose and energy homeostasis at the level of the hypothalamus (see poster, Healthy feeding state) (Belgardt and Brüning, 2010). Activation of insulin receptors on POMC neurons causes membrane hyperpolarization and reduced firing of these neurons (Könner et al., 2007; Williams et al., 2010) while increasing *POMC* mRNA expression (Benoit et al., 2002). However, a recent publication demonstrated that purified insulin actually excites POMC neurons (Qiu et al., 2014). Interestingly, disruption of insulin signaling from POMC neurons did not affect energy or glucose homeostasis (Könner et al., 2007). However, deletion of both insulin and leptin receptors from POMC neurons deteriorates glucose homeostasis and specifically leads to systemic insulin resistance and impaired fertility in mice (Hill et al., 2010). Concomitant insulin and leptin action on POMC neurons also increases the browning of white fat (Dodd et al., 2015), a process that favors enhanced metabolic activity. Furthermore, a very recent study has shown that insulin action on POMC neurons controls adipose-tissue lipolysis and prevents high-fat-diet-induced liver steatosis (Shin et al., 2017). On AgRP/NPY neurons, insulin action is required for the suppressive effect of insulin on HGP. Insulin induces a hyperpolarization and a decreased firing rate of AgRP neurons, thus reducing the release of AgRP and other neurotransmitters, affecting peripheral hepatic innervation, and finally leading to increased interleukin (IL)-6 expression in the liver parenchymal cells (Könner et al., 2007; for a review, see Könner and Brüning, 2012). In the liver, IL-6 action leads to decreased expression of glucose-6-phosphatase and subsequently to reduced gluconeogenesis (Könner et al., 2007).

Adipose tissue-derived leptin, encoded by the *LEP* gene (previously known as *ob*) (Zhang et al., 1994), is released into the plasma in levels proportional to whole-body fat stores (Myers and

Olson, 2012) and is induced by insulin (Russell et al., 2001). Leptin plays a crucial role in the central regulation of food intake and energy homeostasis at multiple levels: it directly excites POMC neurons and induces *POMC* expression, while exerting an inhibitory effect on AgRP/NPY neurons and the expression of *AGRP* (see poster, feeding state) (Sohn et al., 2013b). Thus, the net effect of leptin action within the hypothalamus is to inhibit food intake and to increase energy expenditure. Of note, although the actions of insulin and leptin are interconnected at the level of the hypothalamus and both together are required for a complete anorexigenic and glucoregulatory effect, leptin and insulin act on different subpopulations of POMC neurons (Williams et al., 2010), the characterization of which is urgently needed to decipher their precise function (Belgardt and Brüning, 2010; Vogt and Brüning, 2013).

In addition to the ARC, the VMH represents another effector site for leptin and insulin action in the control of energy homeostasis, and recent studies have sought to establish the physiological relevance of these pathways. Mice with insulin receptor deletion in VMH-specific steroidogenic-factor-1 (SF-1) neurons are protected from diet-induced obesity and deterioration of glucose metabolism and, furthermore, display increased POMC neuron activity under high-fat diet conditions (Klößener et al., 2011). This indicates that high-fat-diet-induced insulin-dependent activation of VMH neurons contributes to obesity development. On the other hand, enhanced leptin receptor signaling in SF-1 neurons within the VMH results in improved glucose homeostasis while body weight is not significantly affected (Zhang et al., 2008). In the DMH, leptin action leads to increased energy expenditure via enhanced sympathetic activation of the BAT, thereby, impacting body weight control independent of food intake (Enriori et al., 2011; Rezai-Zadeh et al., 2014).

Insulin also acts on dopaminergic neurons of the mesolimbic reward system. Here, insulin negatively modulates reward-related behavior such as the desire for high-fat or high-sugar food and reduces hedonic feeding (Könner and Brüning, 2012; Vogt and Brüning, 2013). Likewise, leptin reduces food intake upon injection into the VTA, and ablation of leptin receptors in this area increases the rewarding aspect of highly palatable food (Hommel et al., 2006; for reviews, see Belgardt and Brüning, 2010; Khanh et al., 2014). Intriguingly, a recent study revealed that insulin promotes dopamine release in reward centers in a dynamic fashion. While insulin enhances dopamine release upon food restriction, this effect is lost with an obesogenic diet, indicating that insulin alters food choices depending on the nutritional status of the organism (Stouffer et al., 2015).

Overall, leptin and insulin are major players in the central regulation of energy and glucose homeostasis at various levels within and outside the hypothalamus. Since leptin and insulin receptors are distributed differentially in distinct subsets of central nuclei, a key outstanding challenge is to unequivocally decipher the distinct roles of the different neuronal subsets that express the leptin or insulin receptor, or both together, in terms of central regulation of feeding and glucose control, energy expenditure and reward mechanisms.

#### **Gastrointestinal hormones**

Gastrointestinal hormones have also emerged as important regulators of CNS-dependent energy control. Ghrelin, which is predominantly secreted from the stomach during starvation, robustly stimulates feeding by activating AgRP/NPY neurons, in addition to promoting body weight gain and adiposity via direct effects on PVN neurons (see poster, Healthy fasting state) (Andrews, 2011).

Other hormones, including glucagon-like peptide 1 (GLP-1), peptide YY<sub>3-36</sub> (PYY<sub>3-36</sub>) and cholecystikinin (CCK), are released from the intestine upon nutrient ingestion and exert anorexigenic effects in various brain regions (such as the ARC, the NTS, the DMH, the VMH and the PVN, see poster, Healthy feeding state) and by modulating vagal afferents, the peripheral components of the gut-brain axis (Sobrino Crespo et al., 2014). However, GLP-1 also acts as a neurotransmitter in the brain (for simplicity, GLP-1 is not depicted separately in the poster). This hormone is produced in distinct neuronal populations within the NTS and centrally influences not only food intake, body weight and glucose homeostasis at the level of the ARC (Sandoval and Sisley, 2015) and the PBN (Richard et al., 2014), but also appears to have a major impact on food reward behavior by directly acting on the VTA and the nucleus accumbens (NAc) (Skibicka, 2013). Thereby, GLP-1 reduces food reward behavior and, if food choice is provided, selectively reduces intake of high-fat chow while increasing low-fat chow intake (Alhadeff et al., 2012). Overall, central GLP-1 receptor activation seems to influence food intake, glucose and energy homeostasis at various levels within the CNS (for reviews, see Burcelin and Gourdy, 2017; Lockie, 2013; Baggio and Drucker, 2014; Katsurada and Yada, 2016). However, more research is needed to unravel the exact molecular mechanisms and cellular effectors of GLP-1 receptor-mediated actions. In light of its multiple beneficial effects on body weight regulation, GLP-1 receptor agonists were very recently approved for the treatment of humans that are obese or overweight (Burcelin and Gourdy, 2017).

### **Hypothalamic pathways involved in dysregulated energy homeostasis**

#### **Hypothalamic inflammation, insulin and leptin resistance**

Obesity is associated with chronic low-grade inflammation and resistance to leptin and insulin action not only in the periphery but also in the CNS (see poster, Obese feeding state) (Hotamisligil et al., 1993; Könnner and Brüning, 2012). Research in murine model organisms has contributed substantially to our present understanding of the hypothalamic mechanisms associated with and contributing to the development of obesity, as outlined below. As an early event in obesity development and even within a few days of ingesting a high-fat, calorie-dense diet, an increased amount of saturated fatty acids (FAs) from the periphery crosses the BBB and induces an inflammatory response in hypothalamic neurons (Thaler et al., 2012). This involves activation of microglia, the tissue-resident macrophages in the CNS. Local inflammation in the mediobasal hypothalamus (encompassing the ARC, the anterior part of the PVN and the ME) promotes endoplasmic reticulum (ER) stress in hypothalamic neurons, leading to insulin and leptin resistance (Pimentel et al., 2014; Kleinridders et al., 2009). It has recently been demonstrated that constitutive activation of the proinflammatory c-Jun N-terminal kinase 1 (JNK1) pathway in AgRP neurons increases spontaneous firing in these cells, along with neuronal and systemic leptin resistance, resulting in hyperphagia (overeating), increased weight gain and adiposity (Tsaousidou et al., 2014). Furthermore, constitutive activation of the inflammatory inhibitor of nuclear factor kappa-B kinase 2 (IKK2) pathway blunts the response of AgRP neurons to insulin and impairs systemic glucose homeostasis (Tsaousidou et al., 2014). Thus, hypothalamic inflammation impairs the effects of insulin and leptin, contributing not only to hyperphagia and obesity development but also to the associated dysregulation of glucose homeostasis.

Although POMC and AgRP neurons in the ARC develop insulin resistance in response to a high-fat diet, SF-1-expressing neurons in

the VMH increase their insulin sensitivity, leading to an impairment of the glutamatergic innervation of SF-1 neurons to anorexigenic POMC neurons, resulting in impaired POMC activation. In line with this, ablation of the insulin receptor on SF-1 neurons restores POMC activity and results in a protection from high-fat-diet-induced obesity and the associated deterioration in glucose tolerance (Klökener et al., 2011; Könnner and Brüning, 2012). Similarly, in the obese state, leptin sensitivity is retained in the DMH and increased leptin action on these neurons contributes to obesity-associated hypertension (Simonds et al., 2014) presumably via an increase in sympathetic outflow.

Leptin and insulin resistance in the CNS can also result from overactivation of signal transducer and activator of transcription 3/ suppressor of cytokine signaling 3 (STAT3/SOCS3), an intracellular pathway that is activated by leptin (Vaisse et al., 1996). Chronic activation of STAT3, e.g. due to elevated leptin resulting from growing adiposity, leads to increased SOCS3 activation, which in turn inhibits STAT3 signaling in a negative feedback manner resulting in resistance, not only to leptin, but also to insulin (Ernst et al., 2009). Thus, obesity is associated with selective insulin and leptin resistance at the level of the CNS, whereby leptin and insulin action are attenuated in certain neuronal populations while others become more leptin- and insulin-sensitive, thus further promoting hyperphagia, weight gain and a dysregulation in glucose homeostasis (Könnner and Brüning, 2012). These findings have given rise to the concept of differential neuronal hormone resistance and hypersensitivity – termed ‘selective hormone resistance’ (Könnner and Brüning, 2012).

Collectively, numerous studies in humans have confirmed findings obtained from rodent model organisms that clearly point towards a major role of central insulin resistance in the dysregulation of energy homeostasis and the development of obesity in humans (Heni et al., 2015). However, high-fat-diet-induced obesity is not only associated with a central resistance to insulin and leptin. There is also evidence for the impaired ability of ghrelin to induce food intake at the level of the ARC AgRP/NPY neurons, which could be an adaptive response to prevent further food intake in obese individuals (see poster, Obese fasting state) (Briggs et al., 2010). However, ghrelin-mediated activation of the PVN is retained in obesity (Briggs et al., 2010), which suggests that ghrelin might increase adiposity independent of food intake (Shrestha et al., 2009). Of note, circulating ghrelin levels are lowered in obese humans (Castañeda et al., 2010), presumably again as an adaptive mechanism.

#### **Maternal obesity – a major risk factor for metabolic deteriorations in the offspring**

The number of obese women of reproductive age is increasing worldwide at an alarming rate (Poston et al., 2016). Several observational clinical studies over past decades have revealed a clear association between maternal obesity and the development of metabolic disorders in the offspring (for reviews, see Steculorum et al., 2013; Godfrey et al., 2017). However, the molecular mechanisms that prime offspring of obese mothers for the development of obesity have only recently been investigated in non-human primate and rodent model organisms (Barrett et al., 2016). An elegant study in non-human primates recently demonstrated that high-fat diet intake in obese mothers leads to an overconsumption of high-fat and sucrose-dense (palatable) food, possibly related to an impairment in dopamine signaling and dopaminergic fiber projections to the prefrontal cortex (Rivera et al., 2015). Consistent with this, studies in rat offspring revealed altered

food choice towards energy-dense food and associated obesity development (Bayol et al., 2007) as well as alterations in the dopaminergic mesolimbic system and resulting perturbations in reward responses, including an increased response to a fat-enriched reward (Naef et al., 2008, 2011). Strikingly, a maternal diet rich in saturated fatty acids during gestation and lactation leads to hypothalamic inflammation in rodent offspring (Rother et al., 2012; Pimentel et al., 2012). In line with this, maternal high-fat diet intake has also been shown to induce inflammation in the offspring in non-human primates (Grayson et al., 2010).

In rodents, maternal high-fat diet has been shown to impair leptin signaling at the level of the ARC, leading to an attenuated leptin-induced appetite suppression (Kirk et al., 2009). Furthermore, it has been recently discovered that maternal high-fat feeding during lactation in mice severely alters the projections of POMC and AgRP neurons to second-order neurons, resulting in increased obesity and impaired glucose homeostasis in the offspring (Vogt et al., 2014; for review, see Vogt and Brüning, 2013). In the light of the worldwide growing epidemic of overweight and obese children, more research in this field is desperately needed to better understand which maternal-derived factors and underlying mechanisms increase the risk for obesity in the following generation and how these risk factors can be tackled.

#### Mitochondrial function and dynamics in obesity

Mitochondria have emerged as important players in the development of a number of metabolic disorders including obesity, type 2 diabetes mellitus, and cardiovascular diseases (Wai and Langer, 2016). Mitochondria regulate cellular energy and fuel metabolism in a highly dynamic fashion, enabling fast adaptation to changes in cellular energy supply and demand. In the hypothalamus, mitochondrial reactive oxygen species (ROS) have emerged as important signaling molecules that indicate positive or negative energy states at the level of AgRP/NPY and POMC neurons (see poster) (Shadel and Horvath, 2015). In the negative energy or fasting state, when systemic glucose levels are low, the activation of AgRP/NPY by ghrelin leads to an induction of long-chain fatty acid  $\beta$ -oxidation and concomitant ROS production in AgRP/NPY neurons, which activates uncoupling protein (UCP)2 expression (Andrews et al., 2008). UCP2, in turn, reduces intracellular ROS levels, enabling a sustained energy supply from  $\beta$ -oxidation without ROS generation and thereby promoting sustained AgRP/NPY firing, which results in increased food intake (Andrews et al., 2008). In the positive postprandial energy state, when systemic glucose levels are high, glucose is taken up and oxidized by POMC neurons, leading to the generation of ATP and ROS, and, in turn, to depolarization and increased firing of these neurons, promoting satiety and a decrease in food intake (Diano et al., 2011). Fluctuating hypothalamic ROS levels not only direct hunger and satiety and ultimately food intake, but also energy expenditure and peripheral glucose utilization (Shadel and Horvath, 2015). Upon exposure to a high-fat diet, ROS levels plateau, resulting in impaired satiety signaling in POMC neurons (see poster, Obese feeding state) (Shadel and Horvath, 2015). Mitochondria also constantly adapt to changes in cellular energy levels and fuel availability via conformational changes, so-called ‘fission and fusion’ events and via interaction with the ER (Nasrallah and Horvath, 2014). Mitofusins (MFNs), highly conserved mitochondrial transmembrane GTPases, are of central importance for the regulation of these processes (Schrepfer and Scorrano, 2016). There are two mammalian mitofusins, MFN1 and MFN2. Both have been implicated in mitochondrial fusion processes, while

MFN2 also specifically controls ER morphology and its interaction with mitochondria (Schrepfer and Scorrano, 2016; Wai and Langer, 2016). One study has shown that deletion of MFN1 or MFN2 in AgRP/NPY neurons protects mice from high-fat diet-induced obesity (Dietrich et al., 2013). Deletion of MFN2 in POMC neurons resulted in deprived mitochondria-ER contacts, leptin-resistance, hyperphagia, reduced energy expenditure and morbid obesity (Schneeberger et al., 2013). Interestingly, POMC-specific knockout of MFN1 did not result in any alteration of energy, or glucose homeostasis (Schneeberger et al., 2013). This striking difference in POMC-specific MFN2 versus MFN1 deletion on the metabolic outcome phenotype might indicate the importance of ER integrity and coordinated ER-mitochondrial interactions for proper POMC function.

Taken together, these findings demonstrate the crucial role of mitochondrial function and dynamics not only in the regulation of basal biodynamic processes such as satiety, hunger and whole-body metabolism but also in disease development, suggesting that mitochondrial dynamics could represent novel therapeutic targets in obesity treatment. In support of this, berberine, a natural plant product, used in Chinese medicine, inhibits mitochondrial respiration (Turner et al., 2008; Xu et al., 2014) and has been shown to effectively improve energy and glucose metabolism in insulin-resistant, obese rodents (Lee et al., 2006) and humans (Wei et al., 2012). In addition, Metformin, a first-line treatment in type 2 diabetes (American Diabetes Association, 2016) with neutral effects on body weight, is supposed to exert its antidiabetic effects, at least in part, via inhibition of mitochondrial respiration (Owen et al., 2000; El-Mir et al., 2000). Consistent with this, direct application of metformin to the brain in rodents has been shown to decrease food intake and improve glucose metabolism (Portela et al., 2015).

#### Hypothalamic gene expression in obesity

In accordance with their role in anorexic signaling pathways, mutations in the *MC4R* and *POMC* genes, which encode the melanocortin 4 receptor and pro-opiomelanocortin, respectively, result in hyperphagia and obesity in humans (Krude et al., 1998; Vaisse et al., 1998; Yeo et al., 1998) and rodents (Challis et al., 2004; Huszar et al., 1997; Yaswen et al., 1999; Yeo and Heisler, 2012). The most severe form of obesity in mice and humans results from a deficiency in the genes encoding leptin (*LEP*) or the leptin-receptor (*LEPR*) (Friedman and Halaas, 1998; Zhang et al., 1994; Chen et al., 1996; Montague et al., 1997). Importantly, leptin-deficiency-associated obesity successfully resolves upon treatment with recombinant leptin (Farooqi et al., 1999; Pelleymounter et al., 1995), clearly indicating the major physiological role of leptin in the regulation of whole-body energy homeostasis. Remarkably, mutations underlying monogenetic obesity in humans have been identified not only in the *POMC/MC4R* genes, but also in transcription factors and neurotransmitters that modulate the activity of the homeostatic melanocortin circuitry, such as single-minded homolog 1 (*SIM1*) (Bonfond et al., 2013; Ramachandrapa et al., 2013), brain-derived neurotrophic factor (*BDNF*) (Gray et al., 2006; Han et al., 2008; Xu et al., 2003) and tyrosine receptor kinase B (encoded by *NTRK2*) (Yeo et al., 2004), highlighting their important role in the physiological regulation of energy homeostasis.

Interestingly, genome-wide association studies in humans have revealed a robust association of single nucleotide polymorphisms (SNPs) with excess weight and obesity, not only in or near to the *BDNF* gene (for a review, see Xu and Xie, 2016) but also in intron 1

of the fat mass and obesity-associated protein (*FTO*) gene (Dina et al., 2007; Scuteri et al., 2007; Frayling et al., 2007; for a review, see Hess and Brüning, 2014). It was recently shown that deletion of *Fto* in rodents impairs dopaminergic control of behavioral and neural responses and alters methylation of several neural mRNAs, leading to an altered protein expression level of the encoded proteins and an overall changed dopaminergic midbrain circuitry response, pointing to a role of the *FTO* gene in complex behaviors like reward-based decision-making (Hess et al., 2013). The notion that *FTO* controls dopaminergic signaling has since been confirmed in human fMRI studies (Sevgi et al., 2015). Overall, ongoing and future research exploring genetic variants in obese humans will allow the identification of novel candidate genes leading to the discovery of potential new drug targets for the treatment of obesity.

### New perspectives in CNS-dependent control of feeding behavior and metabolism

A recent report in rodents demonstrated that AgRP neurons are activated by uridine-diphosphate (UDP), which is synthesized from circulating uridine in the CNS by the nucleotide salvage pathway (Steculorum et al., 2015). UDP acts on AgRP neurons via the purinergic receptor 6 (P2Y6) to promote feeding (Steculorum et al., 2015). In the context of obesity, uridine levels are elevated in the circulation (Steculorum et al., 2015), indicating that the uridine/UDP system might be another mechanism that promotes the vicious cycle of increased weight gain along with exaggerated food intake. Consistent with this model, AgRP-neuron-specific P2Y6-deficient mice are protected from high-fat-diet-induced adiposity and insulin resistance (Steculorum et al., 2017) (see poster, Obese fasting state).

A recent study conducted in mice challenged the idea that POMC neurons are solely anorexigenic by showing that activation of the cannabinoid receptor 1 on POMC neurons leads to the release of  $\beta$ -endorphin, an opioid neuropeptide, which in turn promotes feeding (Koch et al., 2015). This anorexigenic-to-orexigenic switch of POMC neurons might be responsible for cannabinoid-induced hyperphagia (Waterson and Horvath, 2015).

Another concept that has recently come to light via studies of rodent model organisms is the active role of astrocytes (glial cells in the nervous system) in the regulation of feeding and glucose homeostasis. First, it was demonstrated that astrocytes are involved in leptin-dependent control of feeding, as ablation of leptin-receptor signaling in astrocytes blunted the anorexic effect of leptin and enhanced fasting and ghrelin-induced hyperphagia (Kim et al., 2014). Second, insulin-receptor signaling in astrocytes was demonstrated to play a crucial role in glucose uptake into the brain, glucose sensing in the hypothalamus, and feeding behavior, as astrocyte-specific deletion of the insulin receptor resulted in increased food intake and deteriorated glucose tolerance (García-Cáceres et al., 2016). In addition, it was recently shown in mice that activation of medial hypothalamic astrocytes directly leads to the inhibition of ghrelin-independent as well as ghrelin-induced food intake via the inhibition of AgRP/NPY neurons (Yang et al., 2015). The study also revealed that inhibition of AgRP/NPY neurons by astrocytes is mediated via increased extracellular levels of adenosine (derived from ATP that is released by astrocytes upon activation), which acts on the adenosine A1 receptor on synaptic AgRP/NPY endings, leading to silencing of AgRP/NPY neurons.

Collectively, these new perspectives on novel regulatory mechanisms in the central control of energy and glucose metabolism highlight that we are only starting to understand how

whole-body energy homeostasis is regulated and which neuronal and non-neuronal components are involved.

### Therapeutic avenues for obesity

The picture that researchers are gradually building of the CNS mechanisms underlying dysregulation of energy and glucose homeostasis is contributing to the development of new candidate therapies for obesity and related disorders. A very promising therapeutic strategy is emerging from pre-clinical and clinical studies with proglucagon-derived dual or triple co-agonists (for an overview of clinical and preclinical studies, see Tschöp et al., 2016). These poly-agonists, consisting of peptide hybrids of a GLP-1 receptor (GLP-1R) agonist and a glucagon receptor (GcgR) agonist (GcgR/GLP-1R) or a GLP-1R agonist together with an agonist for gastric inhibitory polypeptide (GIP) receptor, another important metabolic hormone in glucose homeostasis (GIPR/GLP-1R), exhibit higher efficacy in terms of body weight reduction and glycemic control while giving rise to fewer side effects compared with equimolar doses of mono-agonists in rodents and humans (Finan et al., 2013). Furthermore, preclinical studies with a GcgR/GIPR/GLP-1R triple agonist revealed even more promising results in terms of body weight and glucose control (Finan et al., 2015).

Another encouraging therapeutic approach is the use of a selective MC4R agonist, which has been proven successful in the treatment of *POMC*-deficient obesity (Kuhnen et al., 2016) as well as in humans with non-genetic obesity (Chen et al., 2015a) and in non-human primates (Kievit et al., 2013). However, Phase 2 and Phase 3 studies with a sufficient number of patients enrolled are needed to elucidate if these therapeutic approaches show real promise in terms of effectiveness and side effect profile.

### Conclusions

To tackle the growing obesity epidemic and its associated metabolic disorders, there is an urgent need to further decipher the CNS-level molecular mechanisms that lead to the dysregulation in energy homeostasis. This could set the stage for the development of new therapeutic strategies. One of the most intriguing mysteries that needs to be unraveled is how maternal metabolism impacts neurodevelopmental aspects of the fetus that predispose to obesity and metabolic dysfunction later in life. Moreover, it is becoming increasingly apparent that neuronal populations are not uniform but consist of clustered neurons with very different, unique entities that often result in opposing properties; thus, it is of high importance to fully characterize these neuronal sub-populations and to unravel their distinct features and projections to allow for specific therapeutic targeting. Another high priority question is how the well-known neuronal centers involved in feeding control, such as the hypothalamic nuclei, are regulated by and connected to superordinate brain centers including the reward system and sensory organs (e.g. the gustatory and olfactory systems). It is also important to unravel the role of non-neuronal, CNS-resident cell entities in the regulation of feeding and central metabolism. In summary, it is apparent that dysregulation of energy metabolism in the context of disease is far from being a single-track process allowing for easy and simple solution approaches. Therefore, a broadened view, integrating the different aspects of obesity development is a prerequisite to successfully fight obesity in the future.

### At a glance

A high-resolution version of the poster is available for downloading at <http://dmm.biologists.org/lookup/doi/10.1242/dmm.026609.supplemental>.

## References

- Adams, K. F., Schatzkin, A., Harris, T. B., Kipnis, V., Mouw, T., Ballard-Barbash, R., Hollenbeck, A. and Leitzmann, M. F. (2006). Overweight, obesity, and mortality in a large prospective cohort of persons 50 to 71 years old. *N. Engl. J. Med.* **355**, 763-778.
- Alhadeff, A. L., Rupprecht, L. E., and Hayes, M. R. (2012). GLP-1 neurons in the nucleus of the solitary tract project directly to the ventral tegmental area and nucleus accumbens to control for food intake. *Endocrinology* **153**, 647-658.
- Alonso-Alonso, M., Woods, S. C., Pelchat, M., Grigson, P. S., Stice, E., Farooqi, S., Khoo, C. S., Mattes, R. D. and Beauchamp, G. K. (2015). Food reward system: current perspectives and future research needs. *Nutr. Rev.* **73**, 296-307.
- American Diabetes Association (2016). 7. Approaches to glycemic treatment. *Diabetes Care* **39** Suppl. 1, S52-S59.
- Andrews, Z. B. (2011). Central mechanisms involved in the orexigenic actions of ghrelin. *Peptides* **32**, 2248-2255.
- Andrews, Z. B., Liu, Z.-W., Wallingford, N., Erion, D. M., Borok, E., Friedman, J. M., Tschöp, M. H., Shanabrough, M., Cline, G., Shulman, G. I. et al. (2008). UCP2 mediates ghrelin's action on NPY/AgRP neurons by lowering free radicals. *Nature* **454**, 846-851.
- Atasoy, D., Betley, J. N., Su, H. H. and Sternson, S. M. (2012). Deconstruction of a neural circuit for hunger. *Nature* **488**, 172-177.
- Avery, S. N., Clauss, J. A. and Blackford, J. U. (2016). The human BNST: functional role in anxiety and addiction. *Neuropsychopharmacology* **41**, 126-141.
- Baggio, L. L. and Drucker, D. J. (2014). Glucagon-like peptide-1 receptors in the brain: controlling food intake and body weight. *J. Clin. Invest.* **124**, 4223-4226.
- Balthasar, N., Dalgaard, L. T., Lee, C. E., Yu, J., Funahashi, H., Williams, T., Ferreira, M., Tang, V., Mcgovern, R. A., Kenny, C. D. et al. (2005). Divergence of melanocortin pathways in the control of food intake and energy expenditure. *Cell* **123**, 493-505.
- Barbano, M. F., Wang, H.-L., Morales, M. and Wise, R. A. (2016). Feeding and reward are differentially induced by activating GABAergic lateral hypothalamic projections to VTA. *J. Neurosci.* **36**, 2975-2985.
- Barrett, P., Mercer, J. G. and Morgan, P. J. (2016). Preclinical models for obesity research. *Dis. Model Mech.* **9**, 1245-1255.
- Bayol, S. A., Farrington, S. J. and Stickland, N. C. (2007). A maternal 'junk food' diet in pregnancy and lactation promotes an exacerbated taste for 'junk food' and a greater propensity for obesity in rat offspring. *Br. J. Nutr.* **98**, 843-851.
- Belgardt, B. F. and Brüning, J. C. (2010). CNS leptin and insulin action in the control of energy homeostasis. *Ann. N. Y. Acad. Sci.* **1212**, 97-113.
- Bellinger, L. L. and Bernardis, L. L. (2002). The dorsomedial hypothalamic nucleus and its role in ingestive behavior and body weight regulation: lessons learned from lesioning studies. *Physiol. Behav.* **76**, 431-442.
- Benoit, S. C., Air, E. L., Coolen, L. M., Strauss, R., Jackman, A., Clegg, D. J., Seeley, R. J. and Woods, S. C. (2002). The catabolic action of insulin in the brain is mediated by melanocortins. *J. Neurosci.* **22**, 9048-9052.
- Berridge, K. C. and Kringelbach, M. L. (2008). Affective neuroscience of pleasure: reward in humans and animals. *Psychopharmacology (Berl.)* **199**, 457-480.
- Betley, J. N., Cao, Z. F. H., Ritola, K. D. and Sternson, S. M. (2013). Parallel, redundant circuit organization for homeostatic control of feeding behavior. *Cell* **155**, 1337-1350.
- Bonnefond, A., Raimondo, A., Stutzmann, F., Ghossaini, M., Ramachandrapa, S., Bersten, D. C., Durand, E., Vatin, V., Balkau, B., Lantieri, O. et al. (2013). Loss-of-function mutations in SIM1 contribute to obesity and Prader-Willi-like features. *J. Clin. Invest.* **123**, 3037-3041.
- Briggs, D. I., Enriori, P. J., Lemus, M. B., Cowley, M. A. and Andrews, Z. B. (2010). Diet-induced obesity causes ghrelin resistance in arcuate NPY/AgRP neurons. *Endocrinology* **151**, 4745-4755.
- Burcelin, R. and Gourdy, P. (2017). Harnessing glucagon-like peptide-1 receptor agonists for the pharmacological treatment of overweight and obesity. *Obes. Rev.* **18**, 86-98.
- Cabrele, C., Langer, M., Bader, R., Wieland, H. A., Doods, H. N., Zerbe, O. and Beck-Sickinger, A. G. (2000). The first selective agonist for the neuropeptide YY5 receptor increases food intake in rats. *J. Biol. Chem.* **275**, 36043-36048.
- Calle, E. E., Rodriguez, C., Walker-Thurmond, K. and Thun, M. J. (2003). Overweight, obesity, and mortality from cancer in a prospectively studied cohort of U.S. adults. *N. Engl. J. Med.* **348**, 1625-1638.
- Castañeda, T. R., Tong, J., Datta, R., Culler, M. and Tschöp, M. H. (2010). Ghrelin in the regulation of body weight and metabolism. *Front. Neuroendocrinol.* **31**, 44-60.
- Challis, B. G., Coll, A. P., Yeo, G. S. H., Pinnock, S. B., Dickson, S. L., Thresher, R. R., Dixon, J., Zahn, D., Rochford, J. J., White, A. et al. (2004). Mice lacking pro-opiomelanocortin are sensitive to high-fat feeding but respond normally to the acute anorectic effects of peptide-YY(3-36). *Proc. Natl. Acad. Sci. USA* **101**, 4695-4700.
- Chen, H., Charlat, O., Tartaglia, L. A., Woolf, E. A., Weng, X., Ellis, S. J., Lakey, N. D., Culpepper, J., Moore, K. J., Breitbart, R. E. et al. (1996). Evidence that the diabetes gene encodes the leptin receptor: identification of a mutation in the leptin receptor gene in db/db mice. *Cell* **84**, 491-495.
- Chen, K. Y., Muniyappa, R., Abel, B. S., Mullins, K. P., Staker, P., Brychta, R. J., Zhao, X., Ring, M., Psota, T. L., Cone, R. D. et al. (2015a). RM-493, a melanocortin-4 receptor (MC4R) agonist, increases resting energy expenditure in obese individuals. *J. Clin. Endocrinol. Metab.* **100**, 1639-1645.
- Chen, Y., Lin, Y.-C., Kuo, T.-W. and Knight, Z. A. (2015b). Sensory detection of food rapidly modulates arcuate feeding circuits. *Cell* **160**, 829-841.
- Clark, J. T., Kalra, P. S., Crowley, W. R. and Kalra, S. P. (1984). Neuropeptide Y and human pancreatic polypeptide stimulate feeding behavior in rats. *Endocrinology* **115**, 427-429.
- Cowley, M. A., Smart, J. L., Rubinstein, M., Cerdan, M. G., Diano, S., Horvath, T. L., Cone, R. D. and Low, M. J. (2001). Leptin activates anorexigenic POMC neurons through a neural network in the arcuate nucleus. *Nature* **411**, 480-484.
- Crestani, C. C., Alves, F. H., Gomes, F. V., Resstel, L. B., Correa, F. M. and Herman, J. P. (2013). Mechanisms in the bed nucleus of the stria terminalis involved in control of autonomic and neuroendocrine functions: a review. *Curr. Neuropharmacol.* **11**, 141-159.
- Crowley, V. E. F., Yeo, G. S. H. and O'rahilly, S. (2002). Obesity therapy: altering the energy intake-and-expenditure balance sheet. *Nat. Rev. Drug Discov.* **1**, 276-286.
- De Macedo, I. C., De Freitas, J. S. and Da Silva Torres, I. L. (2016). The influence of palatable diets in reward system activation: a mini review. *Adv. Pharmacol. Sci.* **2016**, 7238679.
- Diano, S., Liu, Z.-W., Jeong, J. K., Dietrich, M. O., Ruan, H.-B., Kim, E., Suyama, S., Kelly, K., Gyengesi, E., Arbisser, J. L. et al. (2011). Peroxisome proliferation-associated control of reactive oxygen species sets melanocortin tone and feeding in diet-induced obesity. *Nat. Med.* **17**, 1121-1127.
- Dietrich, M. O., Liu, Z.-W. and Horvath, T. L. (2013). Mitochondrial dynamics controlled by mitofusins regulate Agrp neuronal activity and diet-induced obesity. *Cell* **155**, 188-199.
- Dina, C., Meyre, D., Gallina, S., Durand, E., Körner, A., Jacobson, P., Carlsson, L. M. S., Kiess, W., Vatin, V., Lecoœur, C., Delplanque, J., Vaillant, E., Pattou, F., Ruiz, J., Weill, J., Levy-Marchal, C., Horber, F. et al. (2007). Variation in FTO contributes to childhood obesity and severe adult obesity. *Nat. Genet.* **39**, 724-726.
- Dodd, G. T., Decherf, S., Loh, K., Simonds, S. E., Wiede, F., Balland, E., Merry, T. L., Münzberg, H., Zhang, Z.-Y., Kahn, B. B. et al. (2015). Leptin and insulin act on POMC neurons to promote the browning of white fat. *Cell* **160**, 88-104.
- Dong, H.-W. and Swanson, L. W. (2006). Projections from bed nuclei of the stria terminalis, anteromedial area: cerebral hemisphere integration of neuroendocrine, autonomic, and behavioral aspects of energy balance. *J. Comp. Neurol.* **494**, 142-178.
- El-Mir, M.-Y., Nogueira, V., Fontaine, E., Averet, N., Rigoulet, M. and Leverve, X. (2000). Dimethylbiguanide inhibits cell respiration via an indirect effect targeted on the respiratory chain complex I. *J. Biol. Chem.* **275**, 223-228.
- Enriori, P. J., Sinnayah, P., Simonds, S. E., Garcia Rudaz, C. and Cowley, M. A. (2011). Leptin action in the dorsomedial hypothalamus increases sympathetic tone to brown adipose tissue in spite of systemic leptin resistance. *J. Neurosci.* **31**, 12189-12197.
- Ernst, M. B., Wunderlich, C. M., Hess, S., Paehler, M., Mesaros, A., Koralov, S. B., Kleinridders, A., Husch, A., Münzberg, H., Hampel, B. et al. (2009). Enhanced Stat3 activation in POMC neurons provokes negative feedback inhibition of leptin and insulin signaling in obesity. *J. Neurosci.* **29**, 11582-11593.
- Fan, W., Boston, B. A., Kesterson, R. A., Hruby, V. J. and Cone, R. D. (1997). Role of melanocortinergic neurons in feeding and the agouti obesity syndrome. *Nature* **385**, 165-168.
- Farooqi, I. S., Jebb, S. A., Langmack, G., Lawrence, E., Cheetham, C. H., Prentice, A. M., Hughes, I. A., Mccamish, M. A. and O'rahilly, S. (1999). Effects of recombinant leptin therapy in a child with congenital leptin deficiency. *N. Engl. J. Med.* **341**, 879-884.
- Farr, O. M., Li, C.-S. and Mantzoros, C. S. (2016). Central nervous system regulation of eating: Insights from human brain imaging. *Metabolism* **65**, 699-713.
- Fekete, C., Légrádi, G., Mihály, E., Huang, Q. H., Tatro, J. B., Rand, W. M., Emerson, C. H. and Lechan, R. M. (2000). alpha-Melanocyte-stimulating hormone is contained in nerve terminals innervating thyrotropin-releasing hormone-synthesizing neurons in the hypothalamic paraventricular nucleus and prevents fasting-induced suppression of prothyrotropin-releasing hormone gene expression. *J. Neurosci.* **20**, 1550-1558.
- Finan, B., Ma, T., Ottaway, N., Muller, T. D., Habegger, K. M., Heppner, K. M., Kirchner, H., Holland, J., Hembree, J., Raver, C. et al. (2013). Unimolecular dual incretins maximize metabolic benefits in rodents, monkeys, and humans. *Sci. Transl. Med.* **5**, 209ra151.
- Finan, B., Yang, B., Ottaway, N., Smiley, D. L., Ma, T., Clemmensen, C., Chabenne, J., Zhang, L., Habegger, K. M., Fischer, K. et al. (2015). A rationally designed monomeric peptide triagonist corrects obesity and diabetes in rodents. *Nat. Med.* **21**, 27-36.
- Frayling, T. M., Timpson, N. J., Weedon, M. N., Zeggini, E., Freathy, R. M., Lindgren, C. M., Perry, J. R. B., Elliott, K. S., Lango, H., Rayner, N. W. et al. (2007). A common variant in the FTO gene is associated with body mass index and predisposes to childhood and adult obesity. *Science* **316**, 889-894.
- Friedman, J. M. (2004). Modern science versus the stigma of obesity. *Nat. Med.* **10**, 563-569.



- Friedman, J. M. and Halaas, J. L. (1998). Leptin and the regulation of body weight in mammals. *Nature* **395**, 763-770.
- Gantz, I., Konda, Y., Tashiro, T., Shimoto, Y., Miwa, H., Munzert, G., Watson, S. J., Delvalle, J. and Yamada, T. (1993a). Molecular cloning of a novel melanocortin receptor. *J. Biol. Chem.* **268**, 8246-8250.
- Gantz, I., Miwa, H., Konda, Y., Shimoto, Y., Tashiro, T., Watson, S. J., Delvalle, J. and Yamada, T. (1993b). Molecular cloning, expression, and gene localization of a fourth melanocortin receptor. *J. Biol. Chem.* **268**, 15174-15179.
- García-Cáceres, C., Quarta, C., Varela, L., Gao, Y., Gruber, T., Legutko, B., Jastroch, M., Johansson, P., Ninkovic, J., Yi, C.-X. et al. (2016). Astrocytic Insulin Signaling Couples Brain Glucose Uptake with Nutrient Availability. *Cell* **166**, 867-880.
- Godfrey, K. M., Reynolds, R. M., Prescott, S. L., Nyirenda, M., Jaddoe, V. W., Eriksson, J. G. and Broekman, B. F. (2017). Influence of maternal obesity on the long-term health of offspring. *Lancet Diabetes Endocrinol* **5**, 53-64.
- Gray, J., Yeo, G. S., Cox, J. J., Morton, J., Adlam, A. L., Keogh, J. M., Yanovski, J. A., El Ghbarawy, A., Han, J. C., Tung, Y. C. et al. (2006). Hyperphagia, severe obesity, impaired cognitive function, and hyperactivity associated with functional loss of one copy of the brain-derived neurotrophic factor (BDNF) gene. *Diabetes* **55**, 3366-3371.
- Grayson, B. E., Levasseur, P. R., Williams, S. M., Smith, M. S., Marks, D. L. and Grove, K. L. (2010). Changes in melanocortin expression and inflammatory pathways in fetal offspring of nonhuman primates fed a high-fat diet. *Endocrinology* **151**, 1622-1632.
- Gropp, E., Shanabrough, M., Borok, E., Xu, A. W., Janoschek, R., Buch, T., Plum, L., Balthasar, N., Hampel, B., Waisman, A. et al. (2005). Agouti-related peptide-expressing neurons are mandatory for feeding. *Nat. Neurosci.* **8**, 1289-1291.
- Han, J. C., Liu, Q. R., Jones, D. M., Levinn, R. L., Menzie, C. M., Jefferson-George, K. S., Adler-Wailes, D. C., Sanford, E. L., Lacbawan, F. L., Uhl, G. R. et al. (2008). Brain-derived neurotrophic factor and obesity in the WAGR syndrome. *N. Engl. J. Med.* **359**, 918-927.
- Heni, M., Kullmann, S., Preissl, H., Fritsche, A. and Häring, H.-U. (2015). Impaired insulin action in the human brain: causes and metabolic consequences. *Nat Rev Endocrinol* **11**, 701-711.
- Hess, M. E. and Brüning, J. C. (2014). The fat mass and obesity-associated (FTO) gene: Obesity and beyond? *Biochim. Biophys. Acta* **1842**, 2039-2047.
- Hess, M. E., Hess, S., Meyer, K. D., Verhagen, L. A. W., Koch, L., Brönneke, H. S., Dietrich, M. O., Jordan, S. D., Saletore, Y., Elemento, O. et al. (2013). The fat mass and obesity associated gene (Fto) regulates activity of the dopaminergic midbrain circuitry. *Nat. Neurosci.* **16**, 1042-1048.
- Hill, J. W., Elias, C. F., Fukuda, M., Williams, K. W., Berglund, E. D., Holland, W. L., Cho, Y.-R., Chuang, J.-C., Xu, Y., Choi, M. et al. (2010). Direct insulin and leptin action on pro-opiomelanocortin neurons is required for normal glucose homeostasis and fertility. *Cell Metab.* **11**, 286-297.
- Hommel, J. D., Trinko, R., Sears, R. M., Georgescu, D., Liu, Z.-W., Gao, X.-B., Thurmon, J. J., Marinelli, M., DiLeone, R. J. (2006). Leptin Receptor Signaling in Midbrain Dopamine Neurons Regulates Feeding. *Neuron* **51**, 801-810.
- Hotamisligil, G. S., Shargill, N. S. and Spiegelman, B. M. (1993). Adipose expression of tumor necrosis factor- $\alpha$ : direct role in obesity-linked insulin resistance. *Science* **259**, 87-91.
- Huszar, D., Lynch, C. A., Fairchild-Huntress, V., Dunmore, J. H., Fang, Q., Berkemeier, L. R., Gu, W., Kesterson, R. A., Boston, B. A., Cone, R. D. et al. (1997). Targeted disruption of the melanocortin-4 receptor results in obesity in mice. *Cell* **88**, 131-141.
- Jennings, J. H., Ung, R. L., Resendez, S. L., Stamatakis, A. M., Taylor, J. G., Huang, J., Veleta, K., Kantak, P. A., Aita, M., Shilling-Scriver, K. et al. (2015). Visualizing hypothalamic network dynamics for appetitive and consummatory behaviors. *Cell* **160**, 516-527.
- Kannan, H., Hayashida, Y. and Yamashita, H. (1989). Increase in sympathetic outflow by paraventricular nucleus stimulation in awake rats. *Am. J. Physiol.* **256**, R1325-R1330.
- Katsurada, K. and Yada, T. (2016). Neural effects of gut- and brain-derived glucagon-like peptide-1 and its receptor agonist. *J Diabetes Investig* **7** Suppl. 1, 64-69.
- Khanh, D. V., Choi, Y.-H., Moh, S. H., Kinyua, A. W. and Kim, K. W. (2014). Leptin and insulin signaling in dopaminergic neurons: relationship between energy balance and reward system. *Front. Psychol.* **5**, 846.
- Kievit, P., Halem, H., Marks, D. L., Dong, J. Z., Glavas, M. M., Sinnayah, P., Pranger, L., Cowley, M. A., Grove, K. L. and Culler, M. D. (2013). Chronic treatment with a melanocortin-4 receptor agonist causes weight loss, reduces insulin resistance, and improves cardiovascular function in diet-induced obese rhesus macaques. *Diabetes* **62**, 490-497.
- Kim, M. S., Small, C. J., Stanley, S. A., Morgan, D. G. A., Seal, L. J., Kong, W. M., Edwards, C. M. B., Abusnana, S., Sunter, D., Ghatgei, M. A. et al. (2000). The central melanocortin system affects the hypothalamo-pituitary thyroid axis and may mediate the effect of leptin. *J. Clin. Invest.* **105**, 1005-1011.
- Kim, J. G., Suyama, S., Koch, M., Jin, S., Argente-Arizon, P., Argente, J., Liu, Z.-W., Zimmer, M. R., Jeong, J. K., Szigeti-Buck, K. et al. (2014). Leptin signaling in astrocytes regulates hypothalamic neuronal circuits and feeding. *Nat. Neurosci.* **17**, 908-910.
- Kim, S. H., Despres, J. P. & Koh, K. K. (2015). Obesity and cardiovascular disease: friend or foe? *Eur. Heart J.* **37**, 3560-3568.
- Kirk, S. L., Samuelsson, A.-M., Argenton, M., Dhonye, H., Kalamatanos, T., Poston, L., Taylor, P. D. and Coen, C. W. (2009). Maternal obesity induced by diet in rats permanently influences central processes regulating food intake in offspring. *PLoS One* **4**, e5870.
- Kleinridders, A., Könnner, A. C. and Brüning, J. C. (2009). CNS-targets in control of energy and glucose homeostasis. *Curr. Opin. Pharmacol.* **9**, 794-804.
- Klöckener, T., Hess, S., Belgardt, B. F., Paeger, L., Verhagen, L. A., Husch, A., Sohn, J.-W., Hampel, B., Dhillon, H., Zigman, J. M. et al. (2011). High-fat feeding promotes obesity via insulin receptor/PI3K-dependent inhibition of SF-1 VMH neurons. *Nat. Neurosci.* **14**, 911-918.
- Koch, M., Varela, L., Kim, J. G., Kim, J. D., Hernández-Nuño, F., Simonds, S. E., Castorena, C. M., Vianna, C. R., Elmquist, J. K., Morozov, Y. M. et al. (2015). Hypothalamic POMC neurons promote cannabinoid-induced feeding. *Nature* **519**, 45-50.
- Könnner, A. C. and Brüning, J. C. (2012). Selective insulin and leptin resistance in metabolic disorders. *Cell Metab.* **16**, 144-152.
- Könnner, A. C., Janoschek, R., Plum, L., Jordan, S. D., Rother, E., Ma, X., Xu, C., Enriori, P., Hampel, B., Barsh, G. S. et al. (2007). Insulin action in AgRP-expressing neurons is required for suppression of hepatic glucose production. *Cell Metab.* **5**, 438-449.
- Könnner, A. C., Klöckener, T. and Brüning, J. C. (2009). Control of energy homeostasis by insulin and leptin: targeting the arcuate nucleus and beyond. *Physiol. Behav.* **97**, 632-638.
- Krashes, M. J., Lowell, B. B. and Garfield, A. S. (2016). Melanocortin-4 receptor-regulated energy homeostasis. *Nat. Neurosci.* **19**, 206-219.
- Kringelbach, M. L. (2005). The human orbitofrontal cortex: linking reward to hedonic experience. *Nat. Rev. Neurosci.* **6**, 691-702.
- Krude, H., Biebermann, H., Luck, W., Horn, R., Brabant, G. and Grüters, A. (1998). Severe early-onset obesity, adrenal insufficiency and red hair pigmentation caused by POMC mutations in humans. *Nat. Genet.* **19**, 155-157.
- Kuhnen, P., Clément, K., Wiegand, S., Blankenstein, O., Gottesdiener, K., Martini, L. L., Mai, K., Blume-Peytavi, U., Grüters, A. and Krude, H. (2016). Proopiomelanocortin deficiency treated with a melanocortin-4 receptor agonist. *N. Engl. J. Med.* **375**, 240-246.
- Lee, Y. S., Kim, W. S., Kim, K. H., Yoon, M. J., Cho, H. J., Shen, Y., Ye, J.-M., Lee, C. H., Oh, W. K., Kim, C. T. et al. (2006). Berberine, a natural plant product, activates AMP-activated protein kinase with beneficial metabolic effects in diabetic and insulin-resistant states. *Diabetes* **55**, 2256-2264.
- Leibowitz, S. F., Hammer, N. J. and Chang, K. (1981). Hypothalamic paraventricular nucleus lesions produce overeating and obesity in the rat. *Physiol. Behav.* **27**, 1031-1040.
- Liu, H., Kishi, T., Roseberry, A. G., Cai, X., Lee, C. E., Montez, J. M., Friedman, J. M. and Elmquist, J. K. (2003). Transgenic mice expressing green fluorescent protein under the control of the melanocortin-4 receptor promoter. *J. Neurosci.* **23**, 7143-7154.
- Lockie, S. H. (2013). Glucagon-like peptide-1 receptor in the brain: role in neuroendocrine control of energy metabolism and treatment target for obesity. *J. Neuroendocrinol.* **25**, 597-604.
- Lu, X. Y., Barsh, G. S., Akil, H. and Watson, S. J. (2003). Interaction between alpha-melanocyte-stimulating hormone and corticotropin-releasing hormone in the regulation of feeding and hypothalamo-pituitary-adrenal responses. *J. Neurosci.* **23**, 7863-7872.
- Mccrea, K., Wisialowski, T., Cabrele, C., Church, B., Beck-Sickinger, A., Kraegen, E. and Herzog, H. (2000). 2-36[K4,RYYS(19-23)]PP a novel Y5-receptor preferring ligand with strong stimulatory effect on food intake. *Regul. Pept.* **87**, 47-58.
- Milam, K. M., Stern, J. S., Storlien, L. H. and Keesey, R. E. (1980). Effect of lateral hypothalamic lesions on regulation of body weight and adiposity in rats. *Am. J. Physiol.* **239**, R337-R343.
- Montague, C. T., Farooqi, I. S., Whitehead, J. P., Soos, M. A., Rau, H., Wareham, N. J., Sewter, C. P., Digby, J. E., Mohammed, S. N., Hurst, J. A. et al. (1997). Congenital leptin deficiency is associated with severe early-onset obesity in humans. *Nature* **387**, 903-908.
- Morrison, S. F., Madden, C. J. and Tupone, D. (2014). Central neural regulation of brown adipose tissue thermogenesis and energy expenditure. *Cell Metab.* **19**, 741-756.
- Morton, G. J., Meek, T. H. and Schwartz, M. W. (2014). Neurobiology of food intake in health and disease. *Nat. Rev. Neurosci.* **15**, 367-378.
- Myers, M. G., Jr and Olson, D. P. (2012). Central nervous system control of metabolism. *Nature* **491**, 357-363.
- Naef, L., Srivastava, L., Gratton, A., Hendrickson, H., Owens, S. M. and Walker, C.-D. (2008). Maternal high fat diet during the perinatal period alters mesocorticolimbic dopamine in the adult rat offspring: reduction in the behavioral responses to repeated amphetamine administration. *Psychopharmacology (Berl.)* **197**, 83-94.

- Naef, L., Moquin, L., Dal Bo, G., Giros, B., Gratton, A. and Walker, C.-D. (2011). Maternal high-fat intake alters presynaptic regulation of dopamine in the nucleus accumbens and increases motivation for fat rewards in the offspring. *Neuroscience* **176**, 225-236.
- Nasrallah, C. M. and Horvath, T. L. (2014). Mitochondrial dynamics in the central regulation of metabolism. *Nat Rev Endocrinol* **10**, 650-658.
- Nicholson, J. R., Peter, J.-C., Lecourt, A. C., Barde, Y.-A. and Hofbauer, K. G. (2007). Melanocortin-4 receptor activation stimulates hypothalamic brain-derived neurotrophic factor release to regulate food intake, body temperature and cardiovascular function. *J. Neuroendocrinol.* **19**, 974-982.
- Nieh, E. H., Matthews, G. A., Allsop, S. A., Presbrey, K. N., Leppla, C. A., Wichmann, R., Neve, R., Wildes, C. P. and Tye, K. M. (2015). Decoding neural circuits that control compulsive sucrose seeking. *Cell* **160**, 528-541.
- Ollmann, M. M., Wilson, B. D., Yang, Y. K., Kerns, J. A., Chen, Y., Gantz, I. and Barsh, G. S. (1997). Antagonism of central melanocortin receptors in vitro and in vivo by agouti-related protein. *Science* **278**, 135-138.
- Owen, M. R., Doran, E. and Halestrap, A. P. (2000). Evidence that metformin exerts its anti-diabetic effects through inhibition of complex 1 of the mitochondrial respiratory chain. *Biochem. J.* **348**, 607-614.
- Parker, E. M., Balasubramaniam, A., Guzzi, M., Mullins, D. E., Salisbury, B. G., Sheriff, S., Witten, M. B. and Hwa, J. J. (2000). [D-Trp(34)] neuropeptide Y is a potent and selective neuropeptide Y Y(5) receptor agonist with dramatic effects on food intake. *Peptides* **21**, 393-399.
- Pelleymounter, M. A., Cullen, M. J., Baker, M. B., Hecht, R., Winters, D., Boone, T. and Collins, F. (1995). Effects of the obese gene product on body weight regulation in ob/ob mice. *Science* **269**, 540-543.
- Pimentel, G. D., Lira, F. S., Rosa, J. C., Oliveira, J. L., Losinskas-Hachul, A. C., Souza, G. I. H., Das Gracas, T. D. C. M., Santos, R. V. T., De Mello, M. T., Tufik, S. et al. (2012). Intake of trans fatty acids during gestation and lactation leads to hypothalamic inflammation via TLR4/NFkappaBp65 signaling in adult offspring. *J. Nutr. Biochem.* **23**, 265-271.
- Pimentel, G. D., Ganeshan, K. and Carvalheira, J. B. C. (2014). Hypothalamic inflammation and the central nervous system control of energy homeostasis. *Mol. Cell. Endocrinol.* **397**, 15-22.
- Portela, L. V., Gnoatto, J., Brochier, A. W., Haas, C. B., De Assis, A. M., De Carvalho, A. K., Hansel, G., Zimmer, E. R., Oses, J. P. and Muller, A. P. (2015). Intracerebroventricular metformin decreases body weight but has pro-oxidant effects and decreases survival. *Neurochem. Res.* **40**, 514-523.
- Poston, L., Caleyachetty, R., Cnattingius, S., Corvalán, C., Uauy, R., Herring, S. and Gillman, M. W. (2016). Preconceptional and maternal obesity: epidemiology and health consequences. *Lancet Diabetes Endocrinol* **4**, 1025-1036.
- Prentki, M., Matschinsky, F. M. and Madiraju, S. R. M. (2013). Metabolic signaling in fuel-induced insulin secretion. *Cell Metab.* **18**, 162-185.
- Qiu, J., Zhang, C., Borgquist, A., Nestor, C. C., Smith, A. W., Bosch, M. A., Ku, S., Wagner, E. J., Rønnekleiv, O. K. and Kelly, M. J. (2014). Insulin excites anorexigenic proopiomelanocortin neurons via activation of canonical transient receptor potential channels. *Cell Metab.* **19**, 682-693.
- Ramachandrapa, S., Raimondo, A., Cali, A. M. G., Keogh, J. M., Henning, E., Saeed, S., Thompson, A., Garg, S., Bochukova, E. G., Brage, S. et al. (2013). Rare variants in single-minded 1 (SIM1) are associated with severe obesity. *J. Clin. Invest.* **123**, 3042-3050.
- Rezai-Zadeh, K., Yu, S., Jiang, Y., Laque, A., Schwartzburg, C., Morrison, C. D., Derbenev, A. V., Zsombok, A. and Munzberg, H. (2014). Leptin receptor neurons in the dorsomedial hypothalamus are key regulators of energy expenditure and body weight, but not food intake. *Mol Metab* **3**, 681-693.
- Richard, J. E., Farkas, I., Anesten, F., Anderberg, R. H., Dickson, S. L., Gribble, F. M., Reimann, F., Jansson, J.-O., Liposits, Z. and Skibicka, K. P. (2014). GLP-1 receptor stimulation of the lateral parabrachial nucleus reduces food intake: neuroanatomical, electrophysiological, and behavioral evidence. *Endocrinology* **155**, 4356-4367.
- Rivera, H. M., Kievit, P., Kirigiti, M. A., Bauman, L. A., Baquero, K., Blundell, P., Dean, T. A., Valteau, J. C., Takahashi, D. L., Frazee, T. et al. (2015). Maternal high-fat diet and obesity impact palatable food intake and dopamine signaling in nonhuman primate offspring. *Obesity (Silver Spring)* **23**, 2157-2164.
- Rodríguez, E. M., Blázquez, J. L. and Guerra, M. (2010). The design of barriers in the hypothalamus allows the median eminence and the arcuate nucleus to enjoy private milieus: the former opens to the portal blood and the latter to the cerebrospinal fluid. *Peptides* **31**, 757-776.
- Roh, E. and Kim, M.-S. (2016). Brain regulation of energy metabolism. *Endocrinol Metab (Seoul)* **31**, 519-524.
- Roh, E., Song Do, K. and Kim, M.-S. (2016). Emerging role of the brain in the homeostatic regulation of energy and glucose metabolism. *Exp. Mol. Med.* **48**, e216.
- Rother, E., Kuschewski, R., Alcazar, M. A. A., Oberthuer, A., Bae-Gartz, I., Vohlen, C., Roth, B. and Dötsch, J. (2012). Hypothalamic JNK1 and IKKbeta activation and impaired early postnatal glucose metabolism after maternal perinatal high-fat feeding. *Endocrinology* **153**, 770-781.
- Russell, C. D., Ricci, M. R., Brolin, R. E., Magill, E. and Fried, S. K. (2001). Regulation of the leptin content of obese human adipose tissue. *Am. J. Physiol. Endocrinol. Metab.* **280**, E399-E404.
- Sandoval, D. and Sisley, S. R. (2015). Brain GLP-1 and insulin sensitivity. *Mol. Cell. Endocrinol.* **418**, 27-32.
- Schneeberger, M., Dietrich, M. O., Sebastián, D., Imberón, M., Castaño, C., García, A., Esteban, Y., Gonzalez-Franquesa, A., Rodríguez, I. C., Bortolozzi, A. et al. (2013). Mitofusin 2 in POMC neurons connects ER stress with leptin resistance and energy imbalance. *Cell* **155**, 172-187.
- Schneeberger, M., Gomis, R. and Claret, M. (2014). Hypothalamic and brainstem neuronal circuits controlling homeostatic energy balance. *J. Endocrinol.* **220**, T25-T46.
- Schrepfer, E. and Scorrano, L. (2016). Mitofusins, from mitochondria to metabolism. *Mol. Cell* **61**, 683-694.
- Scuteri, A., Sanna, S., Chen, W. -M., Uda, M., Albai, G., Strait, J., Najjar, S., Nagaraja, R., Orrú, M., Usala, G., et al. (2007). Genome-wide association scan shows genetic variants in the FTO gene are associated with obesity-related traits. *PLoS Genet.* **3**, e115.
- Sevji, M., Rigoux, L., Kuhn, A. B., Mauer, J., Schilbach, L., Hess, M. E., Gruendler, T. O. J., Ullsperger, M., Stephan, K. E., Brüning, J. C. et al. (2015). An obesity-predisposing variant of the FTO gene regulates D2R-dependent reward learning. *J. Neurosci.* **35**, 12584-12592.
- Shadel, G. S. and Horvath, T. L. (2015). Mitochondrial ROS signaling in organismal homeostasis. *Cell* **163**, 560-569.
- Sheng, Z., Santiago, A. M., Thomas, M. P. and Routh, V. H. (2014). Metabolic regulation of lateral hypothalamic glucose-inhibited orexin neurons may influence midbrain reward neurocircuitry. *Mol. Cell. Neurosci.* **62**, 30-41.
- Shi, Y.-C., Lau, J., Lin, Z., Zhang, H., Zhai, L., Sperk, G., Heilbronn, R., Mietzsch, M., Weger, S., Huang, X.-F. et al. (2013). Arcuate NPY controls sympathetic output and BAT function via a relay of tyrosine hydroxylase neurons in the PVN. *Cell Metab.* **17**, 236-248.
- Shimizu, N., Oomura, Y., Plata-Salamán, C. R. and Morimoto, M. (1987). Hyperphagia and obesity in rats with bilateral ibotenic acid-induced lesions of the ventromedial hypothalamic nucleus. *Brain Res.* **416**, 153-156.
- Shin, A. C., Filatova, N., Lindtner, C., Chi, T., Degann, S., Oberlin, D. and Buettner, C. (2017). Insulin receptor signaling in Pomc, but not Agrp, neurons controls adipose tissue insulin action. *Diabetes*. doi: 10.2337/db16-1238 [Epub ahead of print].
- Shrestha, Y. B., Wickwire, K. and Giraud, S. (2009). Effect of reducing hypothalamic ghrelin receptor gene expression on energy balance. *Peptides* **30**, 1336-1341.
- Simonds, S. E., Pryor, J. T., Ravussin, E., Greenway, F. L., Dileone, R., Allen, A. M., Bassi, J., Elmquist, J. K., Keogh, J. M., Henning, E. et al. (2014). Leptin mediates the increase in blood pressure associated with obesity. *Cell* **159**, 1404-1416.
- Skibicka, K. P. (2013). The central GLP-1: implications for food and drug reward. *Front Neurosci* **7**, 181.
- Sobrinho Crespo, C., Perianes Cachero, A., Puebla Jimenez, L., Barrios, V. and Arilla Ferreiro, E. (2014). Peptides and food intake. *Front Endocrinol (Lausanne)* **5**, 58.
- Sohn, J.-W., Elmquist, J. K. and Williams, K. W. (2013a). Neuronal circuits that regulate feeding behavior and metabolism. *Trends Neurosci.* **36**, 504-512.
- Sohn, J.-W., Harris, L. E., Berglund, E. D., Liu, T., Vong, L., Lowell, B. B., Balthasar, N., Williams, K. W. and Elmquist, J. K. (2013b). Melanocortin 4 receptors reciprocally regulate sympathetic and parasympathetic preganglionic neurons. *Cell* **152**, 612-619.
- Stanley, B. G. and Leibowitz, S. F. (1984). Neuropeptide Y: stimulation of feeding and drinking by injection into the paraventricular nucleus. *Life Sci.* **35**, 2635-2642.
- Steculorum, S. M., Vogt, M. C. and Brüning, J. C. (2013). Perinatal programming of metabolic diseases: role of insulin in the development of hypothalamic neurocircuits. *Endocrinol. Metab. Clin. North Am.* **42**, 149-164.
- Steculorum, S. M., Paeger, L., Bremser, S., Evers, N., Hinze, Y., Idzko, M., Kloppenburg, P. and Brüning, J. C. (2015). Hypothalamic UDP increases in obesity and promotes feeding via P2Y6-dependent activation of AgRP neurons. *Cell* **162**, 1404-1417.
- Steculorum, S. M., Ruud, J., Karakasilioti, I., Backes, H., Engstrom Ruud, L., Timper, K., Hess, M. E., Tsaousidou, E., Mauer, J., Vogt, M. C. et al. (2016). AgRP Neurons control systemic insulin sensitivity via myostatin expression in brown adipose tissue. *Cell* **165**, 125-138.
- Steculorum, S. M., Timper, K., Engström Ruud, L., Evers, N., Paeger, L., Bremser, S., Kloppenburg, P. and Brüning, J. C. (2017). Inhibition of P2Y6 Signaling in AgRP Neurons Reduces Food Intake and Improves Systemic Insulin Sensitivity in Obesity. *Cell Rep.* **18**, 1587-1597.
- Ste Marie, L., Miura, G. I., Marsh, D. J., Yagaloff, K. and Palmiter, R. D. (2000). A metabolic defect promotes obesity in mice lacking melanocortin-4 receptors. *Proc. Natl. Acad. Sci. USA* **97**, 12339-12344.
- Stouffer, M. A., Woods, C. A., Patel, J. C., Lee, C. R., Witkovsky, P., Bao, L., Machold, R. P., Jones, K. T., De Vaca, S. C., Reith, M. E. et al. (2015). Insulin enhances striatal dopamine release by activating cholinergic interneurons and thereby signals reward. *Nat. Commun.* **6**, 8543.
- Stuber, G. D. and Wise, R. A. (2016). Lateral hypothalamic circuits for feeding and reward. *Nat. Neurosci.* **19**, 198-205.

- Tao, Y. X.** (2010). The melanocortin-4 receptor: physiology, pharmacology, and pathophysiology. *Endocr. Rev.* **31**, 506-543.
- Thaler, J. P., Yi, C. X., Schur, E. A., Guyenet, S. J., Hwang, B. H., Dietrich, M. O., Zhao, X., Sarruf, D. A., Izgur, V., Maravilla, K. R. et al.** (2012). Obesity is associated with hypothalamic injury in rodents and humans. *J. Clin. Invest.* **122**, 153-162.
- Tsaousidou, E., Paeger, L., Belgardt, B. F., Pal, M., Wunderlich, C. M., Bronneke, H., Collienne, U., Hampel, B., Wunderlich, F. T., Schmidt-Supprian, M. et al.** (2014). Distinct roles for JNK and IKK activation in agouti-related peptide neurons in the development of obesity and insulin resistance. *Cell Rep* **9**, 1495-1506.
- Tschop, M. H., Finan, B., Clemmensen, C., Gelfanov, V., Perez-Tilve, D., Muller, T. D. and Dimarchi, R. D.** (2016). Unimolecular polypharmacy for treatment of diabetes and obesity. *Cell Metab.* **24**, 51-62.
- Turner, N., Li, J. Y., Gosby, A., To, S. W., Cheng, Z., Miyoshi, H., Taketo, M. M., Cooney, G. J., Kraegen, E. W., James, D. E. et al.** (2008). Berberine and its more biologically available derivative, dihydroberberine, inhibit mitochondrial respiratory complex I: a mechanism for the action of berberine to activate AMP-activated protein kinase and improve insulin action. *Diabetes* **57**, 1414-1418.
- Vaisse, C., Halaas, J. L., Horvath, C. M., Darnell, J. E., Jr, Stoffel, M., Friedman, J. M.** (1996). Leptin activation of Stat3 in the hypothalamus of wild-type and ob/ob mice but not db/db mice. *Nat Genet.* **14**, 95-97.
- Vaisse, C., Clement, K., Guy-Grand, B. and Froguel, P.** (1998). A frameshift mutation in human MC4R is associated with a dominant form of obesity. *Nat. Genet.* **20**, 113-114.
- Vogt, M. C., Paeger, L., Hess, S., Steculorum, S. M., Awazawa, M., Hampel, B., Neupert, S., Nicholls, H. T., Mauer, J., Hausen, A. C. et al.** (2014). Neonatal insulin action impairs hypothalamic neurocircuit formation in response to maternal high-fat feeding. *Cell* **156**, 495-509.
- Vogt, M. C. and Brüning, J. C.** (2013). CNS insulin signaling in the control of energy homeostasis and glucose metabolism - from embryo to old age. *Trends Endocrinol. Metab.* **24**, 76-84.
- Voss-Andreae, A., Murphy, J. G., Ellacott, K. L., Stuart, R. C., Nillni, E. A., Cone, R. D. and Fan, W.** (2007). Role of the central melanocortin circuitry in adaptive thermogenesis of brown adipose tissue. *Endocrinology* **148**, 1550-1560.
- Wai, T. and Langer, T.** (2016). Mitochondrial Dynamics and Metabolic Regulation. *Trends Endocrinol. Metab.* **27**, 105-117.
- Waterson, M. J. and Horvath, T. L.** (2015). Neuronal Regulation of Energy Homeostasis: Beyond the Hypothalamus and Feeding. *Cell Metab.* **22**, 962-970.
- Wei, W., Zhao, H., Wang, A., Sui, M., Liang, K., Deng, H., Ma, Y., Zhang, Y., Zhang, H. and Guan, Y.** (2012). A clinical study on the short-term effect of berberine in comparison to metformin on the metabolic characteristics of women with polycystic ovary syndrome. *Eur. J. Endocrinol.* **166**, 99-105.
- WHO.** (2015). *Obesity and Overweight (WHO Fact sheet 311)*, World Health Organization (<http://www.who.int/mediacentre/factsheets/fs311/en/>) [Online]. [Accessed].
- Williams, K. W., Margatho, L. O., Lee, C. E., Choi, M., Lee, S., Scott, M. M., Elias, C. F. and Elmquist, J. K.** (2010). Segregation of acute leptin and insulin effects in distinct populations of arcuate proopiomelanocortin neurons. *J. Neurosci.* **30**, 2472-2479.
- Wu, Q., Boyle, M. P. and Palmiter, R. D.** (2009). Loss of GABAergic signaling by AgRP neurons to the parabrachial nucleus leads to starvation. *Cell* **137**, 1225-1234.
- Wu, Q., Clark, M. S. and Palmiter, R. D.** (2012). Deciphering a neuronal circuit that mediates appetite. *Nature* **483**, 594-597.
- Xu, B., Goulding, E. H., Zang, K., Cepoi, D., Cone, R. D., Jones, K. R., Tecott, L. H. and Reichardt, L. F.** (2003). Brain-derived neurotrophic factor regulates energy balance downstream of melanocortin-4 receptor. *Nat. Neurosci.* **6**, 736-742.
- Xu, M., Xiao, Y., Yin, J., Hou, W., Yu, X., Shen, L., Liu, F., Wei, L. and Jia, W.** (2014). Berberine promotes glucose consumption independently of AMP-activated protein kinase activation. *PLoS One* **9**, e103702.
- Xu, B., Xie, X.** (2016). Neurotrophic factor control of satiety and body weight. *Nat. Rev. Neurosci.* **17**, 282-292.
- Yang, L., Qi, Y. and Yang, Y.** (2015). Astrocytes control food intake by inhibiting AgRP neuron activity via adenosine A1 receptors. *Cell Rep* **11**, 798-807.
- Yaswen, L., Diehl, N., Brennan, M. B. and Hochgeschwender, U.** (1999). Obesity in the mouse model of pro-opiomelanocortin deficiency responds to peripheral melanocortin. *Nat. Med.* **5**, 1066-1070.
- Yeo, G. S. and Heisler, L. K.** (2012). Unraveling the brain regulation of appetite: lessons from genetics. *Nat. Neurosci.* **15**, 1343-1349.
- Yeo, G. S., Farooqi, I. S., Aminian, S., Halsall, D. J., Stanhope, R. G. and O'Rahilly, S.** (1998). A frameshift mutation in MC4R associated with dominantly inherited human obesity. *Nat. Genet.* **20**, 111-112.
- Yeo, G. S., Connie Hung, C. C., Rochford, J., Keogh, J., Gray, J., Sivaramakrishnan, S., O'Rahilly, S., Farooqi, I. S.** (2004). A de novo mutation affecting human TrkB associated with severe obesity and developmental delay. *Nat. Neurosci.* **7**, 1187-1189.
- Yokosuka, M., Kalra, P. S. and Kalra, S. P.** (1999). Inhibition of neuropeptide Y (NPY)-induced feeding and c-Fos response in magnocellular paraventricular nucleus by a NPY receptor antagonist: a site of NPY action1. *Endocrinology* **140**, 4494-4500.
- Zhang, Y., Proenca, R., Maffei, M., Barone, M., Leopold, L. and Friedman, J. M.** (1994). Positional cloning of the mouse obese gene and its human homologue. *Nature* **372**, 425-432.
- Zhang, R., Dhillon, H., Yin, H., Yoshimura, A., Lowell, B. B., Maratos-Flier, E. and Flier, J. S.** (2008). Selective inactivation of Socs3 in SF1 neurons improves glucose homeostasis without affecting body weight. *Endocrinology* **149**, 5654-5661.
